and modulator of EEG alpha rhythm: A combined PET/EEG study with lorazepam challenge in humans. *Neuroimage* 2004; 22:637-44

11. Eger EI II, Tang M, Liao M, Laster MJ, Solt K, Flood P, Jenkins A, Raines D, Hendrickx JF, Shafer SL, Yasumasa T, Sonner JM: Inhaled anesthetics do not combine to produce synergistic effects regarding minimum alveolar anesthetic concentration in rats. *Anesth Analg* 2008; 107:479-85

12. Eger EI II, Raines DE, Shafer SL, Hemmings HC Jr, Sonner JM: Is a new paradigm needed to explain how inhaled anesthetics produce immobility? *Anesth Analg* 2008; 107:832-48

13. Shafer SL, Hendrickx JF, Flood P, Sonner J, Eger EI II: Additivity *versus*

synergy: A theoretical analysis of implications for anesthetic mechanisms. *Anesth Analg* 2008; 107:507-24.

14. Hendrickx JF, Eger EI II, Sonner JM, Shafer SL: Is synergy the rule? A review of anesthetic interactions producing hypnosis and immobility. *Anesth Analg* 2008; 107:494-506

15. Cheong E, Lee S, Choi BJ, Sun M, Lee CJ, Shin HS: Tuning thalamic firing modes *via* simultaneous modulation of T- and L-type Ca<sup>2+</sup> channels controls pain sensory gating in the thalamus. *J Neurosci* 2008; 28:13331-40

16. Franks NP: General anaesthesia: From molecular targets to neuronal pathways of sleep and arousal. *Nat Rev Neurosci* 2008; 9:370-86

## ■ ANESTHESIOLOGY REFLECTIONS

### Cleyer Introduces Europeans to Acupuncture

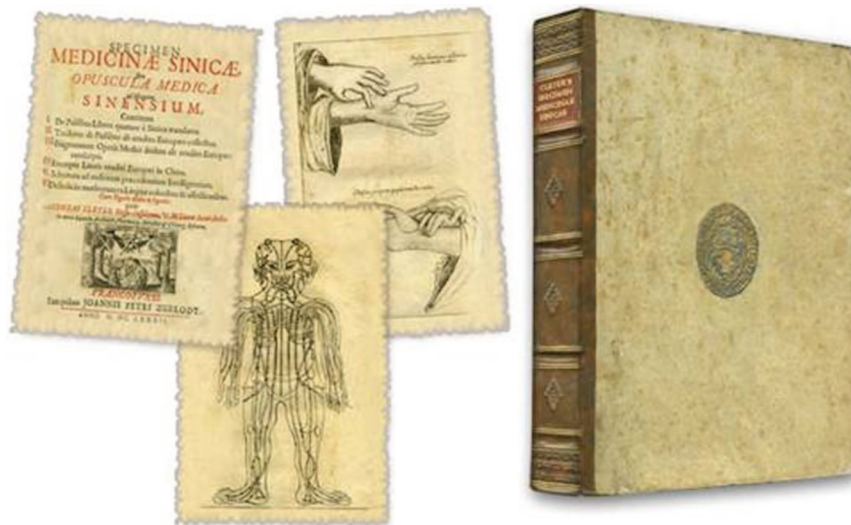

Published in Frankfurt in 1682 by Johann Zubrodt, this is the first and only edition of Andreas Cleyer's *Specimen Medicinae Sinicae*. Housed in the WLM's K. Garth Huston, Sr. Rare Book Room, Cleyer's classic was actually the first illustrated text on Chinese medicine to be published in the West. *Specimen Medicinae Sinicae* familiarized European readers with Chinese medical philosophies and practices such as pulse diagnosis, meridian theories, and acupuncture therapy. Cleyer's text is "bound in contemporary vellum over boards" with a text published earlier in Frankfurt, J. Clauberg's 1681 *Dictata physica private id est Physica contracta . . .* (Copyright © the American Society of Anesthesiologists, Inc. This image appears in color in the Anesthesiology Reflections online collection available at [www.anesthesiology.org](http://www.anesthesiology.org).)

George S. Bause, M.D., M.P.H., Honorary Curator, ASA's Wood Library-Museum of Anesthesiology, Park Ridge, Illinois, and Clinical Associate Professor, Case Western Reserve University, Cleveland, Ohio. [UJYC@aol.com](mailto:UJYC@aol.com).
